# Supplementary material for: Candidate genes linking maternal nutrient exposure to offspring health via DNA methylation: a review of existing evidence in humans with specific focus on one-carbon metabolism
Source: PubMed Central journal article supplement (PMC6280938; doi:10.1093/ije/dyy153), 2018-08-17
Supplement: dyy153_supplementary_table_2.pdf [file dyy153_supplementary_table_2.pdf]

**Supplementary Table 2: Studies investigating associations between nutrition-sensitive candidate genes and phenotypes (Search 2).**

| Reference                                                                         | Study design                                                                                                                                                                                          | Genes Implicated                                                       | Phenotype investigated                                 | Summary of results                                                                                                                                                                                                                                                                                                                                                                                                     |
|-----------------------------------------------------------------------------------|-------------------------------------------------------------------------------------------------------------------------------------------------------------------------------------------------------|------------------------------------------------------------------------|--------------------------------------------------------|------------------------------------------------------------------------------------------------------------------------------------------------------------------------------------------------------------------------------------------------------------------------------------------------------------------------------------------------------------------------------------------------------------------------|
| Azzi S, et al. <i>Epigenetics</i> . 2014; <b>9</b> : 338–45 <sup>1</sup>          | Nested cohort study in France. 254 mother-infant pairs. Healthy infants from the 'EDEN' cohort.<br>Tissue: Cord blood<br>Platform: Allele-specific methylated multiplex real-time quantitative PCR.   | <i>PLAGL1 (ZAC1)</i>                                                   | Pre- and post-natal growth                             | <i>ZAC1</i> methylation index was positively correlated with estimated fetal weight at 32 weeks gestation ( $r=0.15$ , $p=0.01$ ). It was positively correlated with weight ( $r = 0.14$ , $p=0.03$ ) and BMI z-scores ( $r = 0.15$ , $p=0.01$ ) at age 1 year.                                                                                                                                                        |
| Bens S, et al. <i>Eur J Hum Genet</i> . 2013; <b>21</b> :838-43 <sup>2</sup>      | Case-control study. 98 SGA infants and 50 AGA controls from centres of the BMBF consortium, Germany (range 0-18 years).<br>Tissue: Whole blood<br>Platform: Pyrosequencer ID                          | <i>PLAGL1, IGF2R, GRB10, H19, IGF2, MEG3, NDN, SNRPN, NESP, NESPAS</i> | Size at birth                                          | Cases showed hypomethylation at <i>GRB10</i> (n=1) and <i>H19</i> 2CTCF-binding site (n=1), and hypermethylation at <i>NDN</i> (n=1) and <i>IGF2</i> (n=1). Note case study approach therefore not included in main narrative Table 2.                                                                                                                                                                                 |
| Bouwland-Both MI, et al. <i>PLoS One</i> . 2013; <b>8</b> :e81731 <sup>3</sup>    | Nested cohort study ('Generation R' cohort subset). 69 small-for-gestational age (SGA) vs. 471 controls (appropriate-for-gestational-age; AGA).<br>Tissue: Cord blood<br>Platform: EpiTYPER, Sequenom | <i>IGF2, H19, MTHFR</i>                                                | Birthweight and anthropometry. Weight gain at 3 months | Methylation at the <i>MTHFR</i> locus did not vary significantly between SGA and AGA infants. An inverse association was found between SGA and <i>IGF2</i> DMR0 methylation ( $\beta = -1.07$ , $p=0.015$ ). SGA was not significantly associated with <i>H19</i> promoter DMR methylation. <i>IGF2</i> DMR0 methylation was inversely associated with birth-three months weight gain ( $\beta = -0.46$ , $p=0.022$ ). |
| Burris HH, et al., <i>Epigenomics</i> . 2013; <b>5</b> : 271–281 <sup>4</sup>     | Cohort study. 219 infants, Mexico.<br>Tissue: Cord blood.<br>Platform: Pyrosequencing                                                                                                                 | <i>IGF2/H19, KCNQ1OT1, GCR, NR3C1, LINE-1, Alu</i>                     | Birthweight                                            | No significant methylation-birthweight associations were found for the studied loci.                                                                                                                                                                                                                                                                                                                                   |
| Córdova-Palomera A, et al. <i>PLoS One</i> . 2014; <b>9</b> :e103639 <sup>5</sup> | Nested cohort study. 34 monozygotic twin pairs of European descent, Spain. Age 22-56 years.<br>Tissue: Whole blood<br>Platform: Illumina Infinium HumanMethylation450 (450K) Bead-Chip.               | <i>IGF2, IGF2BP1, IGF2BP2, IGF2BP3</i>                                 | Birthweight, working memory                            | Mean methylation at 2 CpG sites in <i>IGF2BP1</i> was associated with birthweight ( $\beta=83.3 \times 10^{-3}$ , $p=0.033$ ) and working memory ( $\beta= -4.4 \times 10^{-3}$ , $p=0.009$ ). No variation in methylation was observed in other loci studied.                                                                                                                                                         |
| Deodati A, et al. <i>Horm Res Paediatr</i> . 2013; <b>79</b> :361-7 <sup>6</sup>  | Cross-sectional study. 85 children, Italy. Mean age 11.6 years.<br>Tissue: Whole blood<br>Platform: Methyl-Profiler DNA Methylation qPCR Assay                                                        | <i>IGF2</i>                                                            | Lipid profile                                          | Children with intermediate methylation at <i>IGF2</i> had significantly higher levels of triglycerides ( $107.6 \pm 41.99$ vs. $76.6 \pm 30.18$ mg/dl, $p < 0.005$ ) and higher triglyceride:high-density lipoprotein-cholesterol ratio ( $2.23 \pm 0.98$ vs. $1.79 \pm 0.98$ , $p < 0.02$ ) in comparison with children showing hypomethylation at <i>IGF2</i> .                                                      |
| Drake AJ, et al. <i>Clin Endocrinol</i> . 2012; <b>77</b> :808-15 <sup>7</sup>    | Retrospective cohort study ('Motherwell'). 34 offspring at 40 years of age.                                                                                                                           | <i>IGF2, H19 ICR, HSD2, NR3C1</i>                                      | Birthweight, current height, weight, waist             | There was an inverse association between methylation at specific CpGs in <i>HSD2</i> and neonatal ponderal index (Region                                                                                                                                                                                                                                                                                               |

| Reference                                                                             | Study design                                                                                                                                                                                                                                                                                                                                                          | Genes Implicated                                        | Phenotype investigated                                                 | Summary of results                                                                                                                                                                                                                                                                                                                                                                                                                                                                                                                                                         |
|---------------------------------------------------------------------------------------|-----------------------------------------------------------------------------------------------------------------------------------------------------------------------------------------------------------------------------------------------------------------------------------------------------------------------------------------------------------------------|---------------------------------------------------------|------------------------------------------------------------------------|----------------------------------------------------------------------------------------------------------------------------------------------------------------------------------------------------------------------------------------------------------------------------------------------------------------------------------------------------------------------------------------------------------------------------------------------------------------------------------------------------------------------------------------------------------------------------|
|                                                                                       | Tissue: Whole blood<br>Platform: Pyrosequencing using PSQTM HS-96A (Qiagen)                                                                                                                                                                                                                                                                                           |                                                         | circumference, blood pressure                                          | 2- CpG14 $r=-0.38$ , CpG19 $r=-0.34$ , $p<0.05$ ) and <i>H19</i> ICR methylation and birth length ( $r=-0.36$ , $p<0.05$ ). <i>HSD2</i> methylation was positively associated with birthweight ( $r=0.49$ , $p<0.05$ ), adiposity measures and blood pressure in adulthood. <i>H19</i> ICR methylation was not significantly associated with birthweight but was positively associated with weight in adulthood ( $\beta=0.37$ , $p=0.03$ ). Both <i>H19</i> and <i>NR3C1</i> Exon methylation were associated with waist circumference, BMI and blood pressure at age 40. |
| Dunstan J, et al., <i>Clin Epigenetics</i> . 2017; <b>29</b> :29 <sup>8</sup>         | 431 adolescents, USA. Age 10-15 years.<br>Tissue: Saliva<br>Platform: Pyromark Q24, Qiagen                                                                                                                                                                                                                                                                            | <i>LEP</i> , <i>ICAM-1</i> , <i>CRH</i> , <i>LINE-1</i> | BMI, waist circumference, percent body fat                             | In obese boys, <i>LEP</i> methylation was inversely associated with the obesity. No significant associations were found for <i>ICAM-1</i> , <i>CRH</i> and <i>LINE-1</i> .                                                                                                                                                                                                                                                                                                                                                                                                 |
| García-Cardona MC, et al. <i>Int J Obes</i> 2014; <b>38</b> :1457-65 <sup>9</sup>     | Cross-sectional study, n=106 divided into lean and obese adolescents, Mexico. Age 10-16 years.<br>Tissue: Whole blood<br>Platform: Methylation-specific PCR                                                                                                                                                                                                           | <i>LEP</i> , <i>ADIPOQ</i>                              | BMI, insulin resistance, glucose, cholesterol and triglycerides levels | No significant variation in overall methylation of <i>LEP</i> , <i>ADIPOQ</i> . Lower methylation at both genes in obese subjects with insulin resistance.                                                                                                                                                                                                                                                                                                                                                                                                                 |
| Godfrey KM, et al. <i>Diabetes</i> . 2011; <b>60</b> : 1528–1534 <sup>10</sup>        | Cohort study, UK (78 mother-child pairs from Princess Anne Hospital (PAH) and 239 mother-infant pairs in replication cohort - Southampton Women's Study(SWS)). Childhood adiposity measurements were made using dual energy X-ray absorptiometry DEXA (PAH study, age 9 years; SWS, age 6 years).<br>Tissue: Cord blood<br>Platform EpiTyper software v1.0 (Sequenom) | <i>RXRA</i> , <i>eNOS</i>                               | Adiposity at age 9 years                                               | <i>RXRA</i> methylation was associated with sex-adjusted childhood fat mass (exponentiated regression coefficient [ $\beta$ ] 17% per SD change in methylation, $p=0.009$ ) and % fat mass ( $\beta=10\%$ , $p=0.023$ ) at age 9 in the PAH cohort and also had similar association in the SWS cohort (Fat mass- $\beta=6\%$ , $p=0.002$ ; %fat mass- $\beta=4\%$ , $p=0.002$ ). Methylation at <i>eNOS</i> was associated with fat mass ( $\beta=20\%$ , $p<0.001$ ) and %fat mass ( $\beta=12\%$ , $p=0.002$ ) in the PAH cohort only.                                   |
| Harvey, NC et al. <i>J Bone Miner Res</i> . 2014; <b>29.3</b> : 600–607 <sup>11</sup> | Cohort, UK (230 Southampton Women's Study and 64 Princess Anne Hospital mother-infant pairs)<br>Tissue: Cord blood<br>Platform: Sequenom MassARRAY Compact System                                                                                                                                                                                                     | <i>RXRA</i>                                             | Bone mineral content at age 4 years                                    | Methylation at four of six <i>RXRA</i> CpG sites inversely correlated with % bone mineral content. Note that maternal free 25(OH)-vitamin D index inversely associated with methylation at one <i>RXRA</i> CpG site ( $\beta=-3.3$ SD/unit, $p=0.03$ ).                                                                                                                                                                                                                                                                                                                    |
| Houde AA, et al. <i>BMC Med Genet</i> . 2015; <b>16</b> :29 <sup>12</sup>             | Cross-sectional study. 73 severely obese adults, Canada. Mean age 34.7 years.<br>Tissue: Blood, subcutaneous (SAT) and visceral adipose tissues (VAT).<br>Platform: Pyrosequencing                                                                                                                                                                                    | <i>LEP</i> , <i>ADIPOQ</i>                              | BMI, anthropometry, blood pressure, lipid profile                      | Higher <i>ADIPOQ</i> methylation levels in SAT were associated with higher BMI and waist circumference. Lower <i>LEP</i> methylation in blood was associated with higher BMI. A positive correlation was found between fasting LDL-C                                                                                                                                                                                                                                                                                                                                       |

| Reference                                                                            | Study design                                                                                                                                                                                                               | Genes Implicated                     | Phenotype investigated          | Summary of results                                                                                                                                                                                                                                                                                                                                                             |
|--------------------------------------------------------------------------------------|----------------------------------------------------------------------------------------------------------------------------------------------------------------------------------------------------------------------------|--------------------------------------|---------------------------------|--------------------------------------------------------------------------------------------------------------------------------------------------------------------------------------------------------------------------------------------------------------------------------------------------------------------------------------------------------------------------------|
|                                                                                      |                                                                                                                                                                                                                            |                                      |                                 | levels and <i>LEP</i> in blood and SAT, and with <i>ADIPOQ</i> in SAT and VAT.                                                                                                                                                                                                                                                                                                 |
| Hoyo C, et al. <i>Cancer Causes Control</i> . 2012; <b>23</b> :635-45 <sup>13</sup>  | Cohort study (NEST cohort), USA. 300 mother-infant pairs.<br>Tissue: Cord blood<br>Platform: Pyromark Q96 MD (Qiagen)                                                                                                      | <i>IGF2, H19</i>                     | Birthweight                     | <i>IGF2</i> DMR0 methylation was inversely associated with <i>IGF2</i> protein concentrations in cord blood ( $\beta = -9.87$ , $p < 0.01$ ), having stronger associations in infants of obese women ( $\beta = -20.21$ , $p < 0.0001$ ). Higher concentrations of <i>IGF2</i> were related to higher birth weight ( $p < 0.001$ ). No associations found with <i>H19</i> DMR. |
| Hoyo C, et al. <i>Epigenetics</i> . 2014; <b>9</b> : 1120–30 <sup>14</sup>           | Cohort study ('NEST' cohort). 438 mother-infant pairs, USA.<br>Tissue: Cord blood leukocytes<br>Platform: Pyromark Q96 MD Pyrosequencer (Qiagen).                                                                          | <i>H19, PEG10/SGCE, PLAGL1, MEG3</i> | Birth weight                    | Higher methylation at <i>H19, PEG10/SGCE</i> and <i>PLAGL1</i> DMRs, and lower <i>MEG3</i> methylation, associated with higher birth weight.                                                                                                                                                                                                                                   |
| Huang RC, et al. <i>Clin Epigenetics</i> . 2012; <b>4</b> :21 <sup>15</sup>          | Cohort study ('Raine' Study). 315 children, Australia.<br>Anthropometric parameters measured at birth and follow ups taken at 8 time points after birth.<br>Tissue: Whole blood at age 17<br>Platform: EpiTyper, Sequenom. | <i>IGF2/H19</i>                      | BMI, anthropometry, birthweight | No association was noted between <i>IGF2/H19</i> ICR1 and anthropometric measures at birth. A 3.4% increase in methylation at 2 specific CpGs in the <i>IGF2/H19</i> ICR was associated with 18 mm decrease in head circumference at age 17 ( $p = 0.006$ ).                                                                                                                   |
| Kappil MA, et al. <i>Epigenetics</i> . 2015; <b>10</b> :842-9 <sup>16</sup>          | Cohort study (Rhode Island Child Health Study (RICHS), USA). 677 mother-infant pairs, subset of $n=211$ for methylation analysis.<br>Tissue: Placenta<br>Platform: Infinium HumanMethylation450 BeadChip.                  | 108 imprinted genes                  | Size at birth                   | Increased methylation of <i>MEST</i> observed in SGA infants. The paper focuses on gene expression data.                                                                                                                                                                                                                                                                       |
| Kuehnen, P. et al. <i>PLoS genetics</i> . 2012; <b>8</b> : p.e1002543 <sup>17</sup>  | Case-control study, Germany. Normal weight controls (mean age 17.9 years, $N=90$ ), obese cases (mean age 11 years, $N=171$ ).<br>Tissue: Peripheral blood<br>Platform: Direct sequencing of bisulfite-converted DNA       | <i>POMC</i>                          | Obesity at age 11 years         | Increased methylation score at <i>POMC</i> in obese children compared to controls. Overall CpG methylation score from position -4 to +6 was 40% in cases and 25% in controls ( $p < 0.001$ ).                                                                                                                                                                                  |
| Kühnen P, et al. <i>Cell Metab</i> . 2016; <b>24</b> :502–509 <sup>18</sup>          | Case-control study in German adults: 103 normal-weight and 125 obese, mean age 48.2 years.<br>Tissue: Peripheral blood<br>Platform: Pyromark Q24 (Qiagen)                                                                  | <i>POMC</i>                          | BMI                             | Positive correlation of average <i>POMC</i> VMR methylation with BMI ( $r = 0.18$ , $p = 0.006$ ).                                                                                                                                                                                                                                                                             |
| Lesseur C, et al. <i>Mol Cell Endocrinol</i> . 2013; <b>381</b> :160-7 <sup>19</sup> | Nested cohort study, USA. Rhode Island Child Health Study 'RICHS' cohort, 81 mother-infant pairs, categorised by birth size.<br>Tissue: Cord blood, placenta<br>Platform: Pyromark MD (Qiagen)                             | <i>LEP</i>                           | Size at birth                   | Higher <i>LEP</i> methylation levels were observed in SGA children ( $p = 4.6 \times 10^{-3}$ ). Infants born to pre-pregnancy obese mothers had lower cord blood methylation levels ( $p = 0.03$ ). There was an interaction between placental <i>LEP</i> methylation and sex ( $p = 0.05$ ).                                                                                 |

| Reference                                                                              | Study design                                                                                                                                                                                                                                                     | Genes Implicated                                                                                                  | Phenotype investigated                     | Summary of results                                                                                                                                                                                                                                                                                                                                                                                                                                                                                                                |
|----------------------------------------------------------------------------------------|------------------------------------------------------------------------------------------------------------------------------------------------------------------------------------------------------------------------------------------------------------------|-------------------------------------------------------------------------------------------------------------------|--------------------------------------------|-----------------------------------------------------------------------------------------------------------------------------------------------------------------------------------------------------------------------------------------------------------------------------------------------------------------------------------------------------------------------------------------------------------------------------------------------------------------------------------------------------------------------------------|
| Lesseur C, et al. <i>Psychoneuroendocrinology</i> . 2014; <b>40</b> :1-9 <sup>20</sup> | Nested cohort study, USA. Rhode Island Child Health Study 'RICHs' cohort. N=444. NICU Network Neurobehavioral Scales (NNS) used for neurobehavior testing.<br>Tissue: Placenta<br>Platform: Pyromark MD (Qiagen)                                                 | <i>LEP</i>                                                                                                        | Neurobehavior                              | In male infants increased <i>LEP</i> methylation was associated with membership in the profile of increased lethargy and hypotonicity (OR = 1.9; 95% CI: 1.07–3.4), and reduced risk of membership in the profile of decreased lethargy and hypotonicity (OR = 0.54; 95% CI: 0.3–0.94).                                                                                                                                                                                                                                           |
| Lester BM, et al. <i>Epigenomics</i> . 2015; <b>7</b> :1123-36 <sup>21</sup>           | Cross-sectional study of 67 preterm infants, USA.<br>Tissue: Buccal cells<br>Platform: Pyrosequencing                                                                                                                                                            | <i>HSD2</i> and <i>NR3C1</i>                                                                                      | Neurobehaviour                             | Infants with a high-risk neurobehavioral profile showed increased <i>NR3C1</i> methylation and decreased <i>HSD2</i> methylation compared to infants with a low-risk neurobehavioral profile.                                                                                                                                                                                                                                                                                                                                     |
| Lin, X, et al. <i>BMC Med</i> . 2017 Mar 7; <b>15</b> :50 <sup>22</sup>                | Cohort study ('GUSTO' cohort), 987 mother-infant pairs, Singapore.<br>Tissue: Cord blood.<br>Platform: Illumina Infinium HumanMethylation450 BeadChip                                                                                                            | <i>ANK3</i> , <i>CDKN2B</i> , <i>IGDCC4</i> , <i>P4HA3</i> , <i>MIRLET7BHG</i> , <i>CACNA1G</i> and <i>ZNF423</i> | Birthweight, size and adiposity at 4 years | Methylation at <i>ANK3</i> , <i>CDKN2B</i> , <i>IGDCC4</i> , <i>P4HA3</i> , <i>MIRLET7BHG</i> , <i>CACNA1G</i> and <i>ZNF423</i> were associated with birth weight. <i>MIRLET7BHG</i> was the only 'nutrition-sensitive' loci considered in this review, however.                                                                                                                                                                                                                                                                 |
| Murphy R, et al. <i>BMC Med Genet</i> . 2014; <b>15</b> :67 <sup>23</sup>              | Cohort study (Auckland Birthweight Collaborative ('ABC' study) following 153 children out of which 80 were SGA. Age 11 years<br>Tissue: whole blood<br>Platform: Methylation-specific multiplex-ligation-dependent probe amplification assay and pyrosequencing. | <i>IGF2</i> , <i>H19</i> , <i>KCNQ10T1</i>                                                                        | Size at birth                              | <i>IGF2</i> DMR0 methylation was 2.7% lower in SGA children. Methylation did not vary at <i>H19</i> and <i>KCNQ10T1</i> ICRs.                                                                                                                                                                                                                                                                                                                                                                                                     |
| Paquette AG, et al. <i>Epigenomics</i> . 2015; <b>7</b> :767-79 <sup>24</sup>          | Rhode Island Child Health Study 'RICHs' cohort . N=547 infants. NICU Network Neurobehavioral Scales (NNS) used for neurobehavior testing.<br>Tissue: Placenta<br>Platform: Pyromark MD (Qiagen)                                                                  | <i>NR3C1</i> , <i>HSD11B2</i> , <i>FKBP5</i> , <i>ADCYAP1R1</i>                                                   | Neurobehaviour                             | Using maximum likelihood factor analysis, 3 factors were identified as explaining the maximum variability in DNA methylation. <i>NR3C1</i> loaded strongly onto a factor that was associated with decreased quality of movement and self-regulation, increased arousal and excitability, and increased non-optimal refluxes and stress abstinence scores, also referred to as a 'poorly regulated' profile. <i>HSD11B2</i> methylation loaded onto factor associated with reducing risk of being in the poorly regulated profile. |
| Qian YY, et al. <i>J Hum Nutr Diet</i> . 2016; <b>29</b> :643-51 <sup>25</sup>         | Case-control study. 39 small-for-gestational age (SGA) infants and 49 appropriate-for-gestational-age (AGA) controls, China.<br>Tissue: Umbilical cord blood<br>Platform: EpiTYPER, Sequenom.                                                                    | <i>MEST</i> , <i>H19</i>                                                                                          | Size at birth                              | Methylation in SGA children was higher (p<0.05) than controls at 3 sites in the <i>H19</i> DMR. Six sites in the <i>H19</i> DMR had higher methylation in SGA compared to AGA, but only in only males born to mothers who supplemented in pregnancy with folic acid.                                                                                                                                                                                                                                                              |

| Reference                                                                                      | Study design                                                                                                                                                                                                                                                                                | Genes Implicated                                   | Phenotype investigated | Summary of results                                                                                                                                                                                                                                                                                                                                                                    |
|------------------------------------------------------------------------------------------------|---------------------------------------------------------------------------------------------------------------------------------------------------------------------------------------------------------------------------------------------------------------------------------------------|----------------------------------------------------|------------------------|---------------------------------------------------------------------------------------------------------------------------------------------------------------------------------------------------------------------------------------------------------------------------------------------------------------------------------------------------------------------------------------|
| Rijlaarsdam J, et al. <i>J Child Psychol Psychiatry</i> . 2017; <b>58</b> :19-27 <sup>26</sup> | Nested cohort study ('ALSPAC' cohort). 164 youth with low conduct problems (CP) and early onset persistent (EOP) ADHD.<br>Tissue: Cord blood, peripheral blood at age 7<br>Platform: Illumina Infinium HumanMethylation450 BeadChip                                                         | <i>IGF2</i>                                        | ADHD                   | In the case of EOP individuals, <i>IGF2</i> methylation was positively associated with ADHD symptoms.                                                                                                                                                                                                                                                                                 |
| Souren NY, et al., <i>Obesity</i> . 2011; <b>19</b> :1519-22 <sup>27</sup>                     | Monozygotic (MZ) twins study. 16 BMI discordant MZ twin pairs recruited from the East Flanders Prospective Twin Survey (EFPTS), Belgium. Mean age 30.9 years.<br>Tissue: Saliva<br>Platform: PCR amplification followed by a single-nucleotide primer extension reaction                    | <i>KvDMR1, H19, IGF2, GRB10, MEST, SNRPN, GNAS</i> | BMI                    | Methylation differences of the studied imprinted genes in salivary DNA did not account for the discordance in BMI between twins in this cohort.                                                                                                                                                                                                                                       |
| St-Pierre J, et al. <i>Epigenetics</i> . 2012; <b>7</b> :1125-32 <sup>28</sup>                 | Cohort study. 50 mother-infant pairs, French-Canadian origin, Canada.<br>Tissue: Placenta<br>Platform: Pyromark Q24 (Qiagen)                                                                                                                                                                | <i>IGF2, H19</i>                                   | Birthweight            | <i>IGF2</i> DMR2 mean methylation on the fetal placental side was positively correlated with birthweight (Spearman rank correlation=0.44, $p < 0.01$ ), height ( $r=0.40$ , $p < 0.01$ ), head ( $r=0.32$ , $p < 0.05$ ) and thorax ( $r=0.32$ , $p < 0.05$ ) circumference. 31% variance in birth weight could be accounted for by <i>IGF2/H19</i> genotype and epigenotype jointly. |
| Steegers-Theunissen RP, et al. <i>PLoS One</i> . 2009; <b>4</b> : e784 <sup>29</sup>           | Cross sectional study amongst controls for another study ('HAVEN'). 120 mother-infant pairs, The Netherlands.<br>Tissue: Infant blood taken at 17 months.<br>Platform: EpiTyper, Sequenom                                                                                                   | <i>IGF2</i>                                        | Birth weight           | <i>IGF2</i> methylation was inversely associated with birthweight ( -1.7% methylation per SD birthweight; $p=0.034$ ).                                                                                                                                                                                                                                                                |
| Tobi EW, et al. <i>Epigenetics</i> . 2011; <b>6</b> :171-6 <sup>30</sup>                       | Cohort study (The Dutch Project on Preterm and Small for Gestational Age Infants ('POPS')). 38 small for gestational age (SGA) and 75 appropriate for gestational age (AGA) individuals studied.<br>Tissue: Whole blood at age 19. Methylation analysis by<br>Platform: EpiTyper, Sequenom. | <i>IGF2, GNASAS, INSIGF, LEP</i>                   | Size at birth          | Methylation levels of <i>IGF2</i> DMRO, <i>GNASAS</i> , <i>INSIGF</i> and <i>LEP</i> did not significantly vary between SGA and AGA individuals at 19 years of age.                                                                                                                                                                                                                   |
| Wijnands KP, et al. <i>Nutr Metab Cardiovasc Dis</i> . 2015; <b>25</b> :608-14 <sup>31</sup>   | Cohort study. 120 healthy children at 17 months of age, Netherlands.<br>Tissue: Whole blood<br>Platform: EpiTyper, Sequenom.                                                                                                                                                                | <i>TNFa, LEP</i>                                   | Lipid profile          | High-density lipoprotein-cholesterol levels in the children were inversely associated with <i>TNFa</i> methylation (-6.1%, $p = 0.058$ ) and <i>LEP</i> (-3.4%, $p = 0.021$ )                                                                                                                                                                                                         |

**Abbreviations:** ADHD, attention-deficit/hyperactivity disorder; BMI, body mass index; CI, confidence interval; DMR, differentially methylated region; ICR, imprinting control region; LDL-c, low-density lipoprotein cholesterol; OR, odds ratio; SD, standard deviation; VMR, variably methylated region.

## References

1. Azzi S, Sas TCJ, Koudou Y, et al. Degree of methylation of ZAC1 (PLAGL1) is associated with prenatal and post-natal growth in healthy infants of the EDEN mother child cohort. *Epigenetics*. 2014 Mar 6;**9**(3):338–45.
2. Bens S, Haake A, Richter J, et al. Frequency and characterization of DNA methylation defects in children born SGA. *Eur J Hum Genet*. 2013 Aug;**21**(8):838–43.
3. Bouwland-Both MI, Mil NH van, Stolk L, et al. DNA methylation of IGF2DMR and H19 is associated with fetal and infant growth: the generation R study. *PLoS One*. 2013 Jan 12;**8**(12):e81731.
4. Burris HH, Braun JM, Byun H, et al. Association between birth weight and DNA methylation of IGF2, glucocorticoid receptor and repetitive elements LINE-1 and Alu. *Epigenomics*. 2013 Jun;**5**(3):271–81.
5. Córdova-Palomera A, Alemany S, Fatjó-Vilas M, et al. Birth weight, working memory and epigenetic signatures in IGF2 and related genes: a MZ twin study. *PLoS One*. 2014;**9**(8):e103639.
6. Deodati A, Inzaghi E, Liguori A, et al. IGF2 methylation is associated with lipid profile in obese children. *Horm Res Paediatr*. 2013;**79**(6):361–7.
7. Drake AJ, McPherson RC, Godfrey KM, et al. An unbalanced maternal diet in pregnancy associates with offspring epigenetic changes in genes controlling glucocorticoid action and foetal growth. *Clin Endocrinol*. 2012 Dec;**77**(6):808–15.
8. Dunstan J, Bressler JP, Moran TH, et al. Associations of LEP, CRH, ICAM-1, and LINE-1 methylation, measured in saliva, with waist circumference, body mass index, and percent body fat in mid-childhood. *Clin Epigenetics*. 2017 Dec;**9**(1):29.
9. García-Cardona MC, Huang F, García-Vivas JM, et al. DNA methylation of leptin and adiponectin promoters in children is reduced by the combined presence of obesity and insulin resistance. *Int J Obes*. 2014 Nov;**38**(11):1457–65.
10. Godfrey KM, Sheppard A, Gluckman PD, et al. Epigenetic Gene Promoter Methylation at Birth Is Associated With Child's Later Adiposity. *Diabetes*. 2011 Apr 6;**60**(5):1528–1534.
11. Harvey NC, Sheppard A, Godfrey KM, et al. Childhood bone mineral content is associated with methylation status of the RXRA promoter at birth. *J Bone Miner Res*. 2014 Mar;**29**(3):600–7.
12. Houde A-A, Légaré C, Biron S, et al. Leptin and adiponectin DNA methylation levels in adipose tissues and blood cells are associated with BMI, waist

- girth and LDL-cholesterol levels in severely obese men and women. *BMC Med Genet*. 2015 May;**16**:29.
13. Hoyo C, Fortner K, Murtha AP, et al. Association of cord blood methylation fractions at imprinted insulin-like growth factor 2 (IGF2), plasma IGF2, and birth weight. *Cancer Causes Control*. 2012;**23**(4):635–645.
  14. Hoyo C, Daltveit AK, Iversen E, et al. Erythrocyte folate concentrations, CpG methylation at genomically imprinted domains, and birth weight in a multiethnic newborn cohort. *Epigenetics*. 2014 Aug 27;**9**(8):1120–30.
  15. Huang R-C, Galati JC, Burrows S, et al. DNA methylation of the IGF2/H19 imprinting control region and adiposity distribution in young adults. *Clin Epigenetics*. 2012 Nov;**4**(1):21.
  16. Kappil MA, Green BB, Armstrong DA, et al. Placental expression profile of imprinted genes impacts birth weight. *Epigenetics*. 2015;**10**(9):842–9.
  17. Kuehnen P, Mischke M, Wiegand S, et al. An Alu element-associated hypermethylation variant of the POMC gene is associated with childhood obesity. Yeo GSH, editor. *PLoS Genet*. 2012 Mar 15;**8**(3):e1002543.
  18. Kühnen P, Handke D, Waterland RA, et al. Interindividual Variation in DNA Methylation at a Putative POMC Metastable Epiallele Is Associated with Obesity. *Cell Metab*. 2016 Sep 13;**24**(3):502–9.
  19. Lesseur C, Armstrong DA, Paquette AG, Koestler DC, Padbury JF, Marsit CJ. Tissue-specific Leptin promoter DNA methylation is associated with maternal and infant perinatal factors. *Mol Cell Endocrinol*. 2013 Dec 5;**381**(1–2):160–7.
  20. Lesseur C, Armstrong DA, Murphy MA, et al. Sex-specific associations between placental leptin promoter DNA methylation and infant neurobehavior. *Psychoneuroendocrinology*. 2014 Feb;**40**(1):1–9.
  21. Lester BM, Marsit CJ, Giarraputo J, Hawes K, LaGasse LL, Padbury JF. Neurobehavior related to epigenetic differences in preterm infants. *Epigenomics*. 2015 Oct;**7**(7):1123–36.
  22. Lin X, Lim IY, Wu Y, et al. Developmental pathways to adiposity begin before birth and are influenced by genotype, prenatal environment and epigenome. *BMC Med*. 2017 Mar 7;**15**(1):50.
  23. Murphy R, Thompson JM, Tost J, Mitchell E a, Auckland Birthweight Collaborative Study Group. No evidence for copy number and methylation variation in H19 and KCNQ10T1 imprinting control regions in children born small for gestational age. *BMC Med Genet*. 2014;**15**(1):67.
  24. Paquette AG, Lester BM, Lesseur C, et al. Placental epigenetic patterning of glucocorticoid response genes is associated with infant neurodevelopment. *Epigenomics*. 2015 Aug;**7**(5):767–779.
  25. Qian Y-Y, Huang X-L, Liang H, et al. Effects of maternal folic acid supplementation on gene methylation and being small for gestational age. *J Hum*

*Nutr Diet.* 2016 Oct;**29**(5):643–651.

26. Rijlaarsdam J, Cecil CAM, Walton E, et al. Prenatal unhealthy diet, insulin-like growth factor 2 gene (IGF2) methylation, and attention deficit hyperactivity disorder symptoms in youth with early-onset conduct problems. *J Child Psychol Psychiatry.* 2017 Jan;**58**(1):19–27.
27. Souren NYP, Tierling S, Fryns J-P, Derom C, Walter J, Zeegers MP. DNA methylation variability at growth-related imprints does not contribute to overweight in monozygotic twins discordant for BMI. *Obesity.* 2011 Jul;**19**(7):1519–22.
28. St-Pierre J, Hivert M-F, Perron P, et al. IGF2 DNA methylation is a modulator of newborn's fetal growth and development. *Epigenetics.* 2012 Oct;**7**(10):1125–32.
29. Steegers-Theunissen RP, Obermann-Borst SA, Kremer D, et al. Periconceptional maternal folic acid use of 400 microg per day is related to increased methylation of the IGF2 gene in the very young child. *PLoS One.* 2009 Jan 16;**4**(11):e7845.
30. Tobi EW, Heijmans BT, Kremer D, et al. DNA methylation of IGF2, GNASAS, INSIGF and LEP and being born small for gestational age. *Epigenetics.* 2011 Feb;**6**(2):171–6.
31. Wijnands KPJ, Obermann-Borst SA, Steegers-Theunissen RPM. Early life lipid profile and metabolic programming in very young children. *Nutr Metab Cardiovasc Dis.* 2015 Jun;**25**(6):608–14.
